# Supplementary material for: Synthesis of ordered mesoporous bifunctional TiO2–SiO2–polymer nanocomposites
Source: Royal Society of Chemistry journal article supplement (doi:10.1039/b911107g), 2009-01-01

## Supplementary Data

### Synthesis of Ordered Mesoporous Bifunctional Ti-SiO<sub>2</sub>-Polymer Nanocomposite

**HuaQin Chu,<sup>a</sup> Chao Yu<sup>a</sup>, Ying Wan,<sup>\*a</sup> Dongyuan Zhao<sup>b</sup>**

<sup>a</sup>Department of Chemistry, Shanghai Normal University, Shanghai 200234, P. R.

China; <sup>b</sup> Department of Chemistry and Shanghai Key Laboratory of Molecular  
Catalysis and Innovative Materials, Fudan University, Shanghai 200433, P. R. China

\* To whom correspondence should be addressed. Tel: 86-21-6432-2516; Fax:  
86-21-6432-2272; E-mail: [ywan@shnu.edu.cn](mailto:ywan@shnu.edu.cn)

Fig. S1.  $V-t$  plot analysis for mesoporous Ti-SiO<sub>2</sub>-polymer composites with various Si/Ti ratios and polymer contents MTSP- $n$ -50 (a) and MTSP- $n$ -35 (b) ( $n = 50 - 10$ ), which are prepared from the triblock-copolymer-templating route using TIPOT as a titanium source, TEOS as a silica source, preformed resin as a polymer source and triblock copolymer F127 as a template.

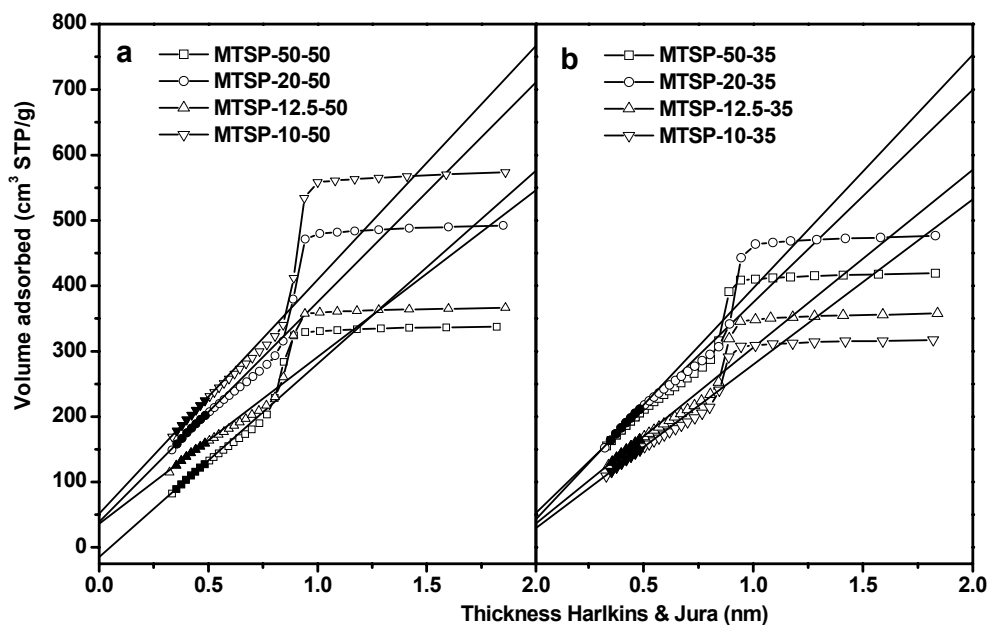

Fig. S2. N<sub>2</sub> sorption isotherms (a) and pore-size distribution curves (b) for the mesoporous Ti-SiO<sub>2</sub> derivation which is obtained from the bifunctional composite MTSP-20-50 after combustion at 500 °C in air.

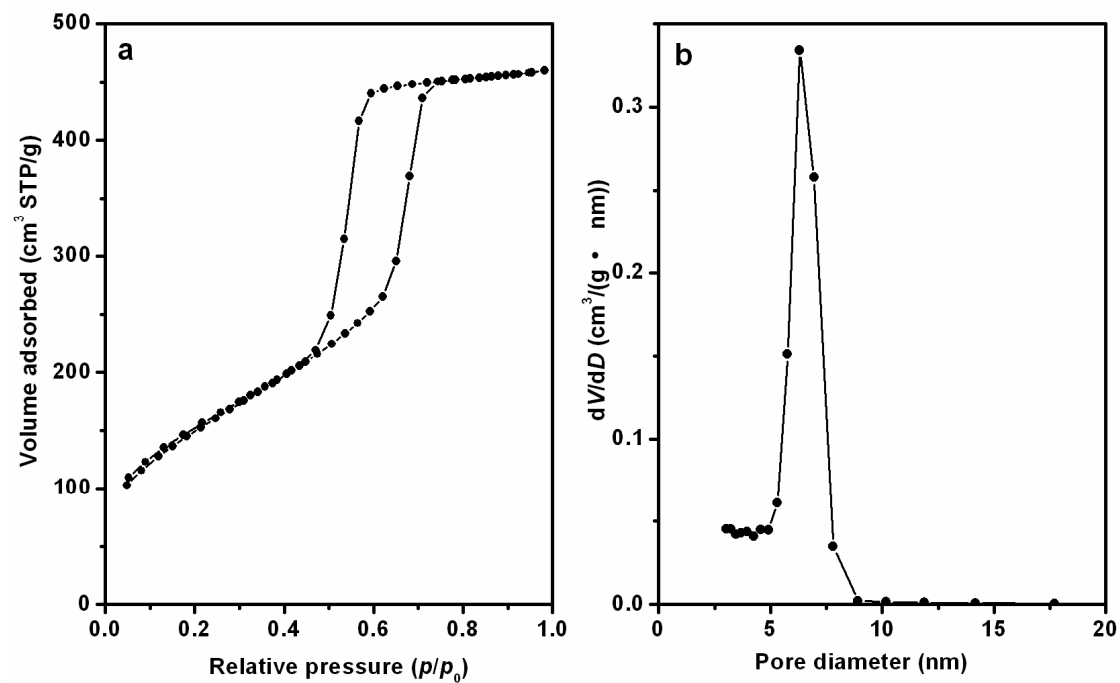

Fig. S3. Small-angle XRD patterns for MTSP-20-50 after calcination at 600 °C in nitrogen, and the inorganic solid and carbon descendants after further combustion at 500 °C in air and acidic treatment, respectively.

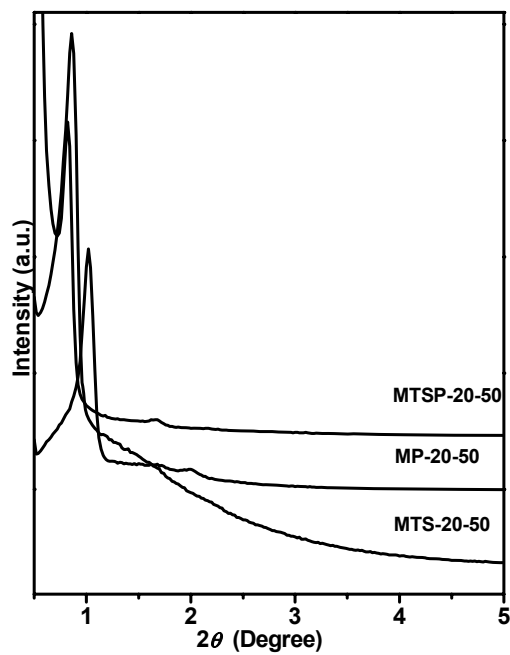

Supplement: b911107g.pdf [file b911107g.pdf]
